# Supplementary material
Source: PubMed Central journal article supplement (PMC9452469)
Supplement: NIHMS1819627-supplement-1.pdf [file NIHMS1819627-supplement-1.pdf]

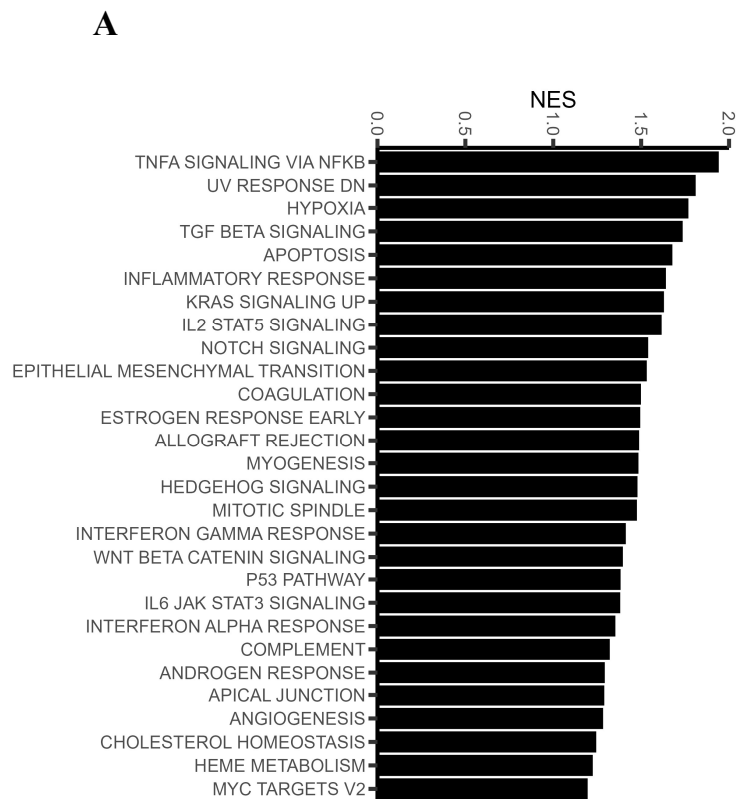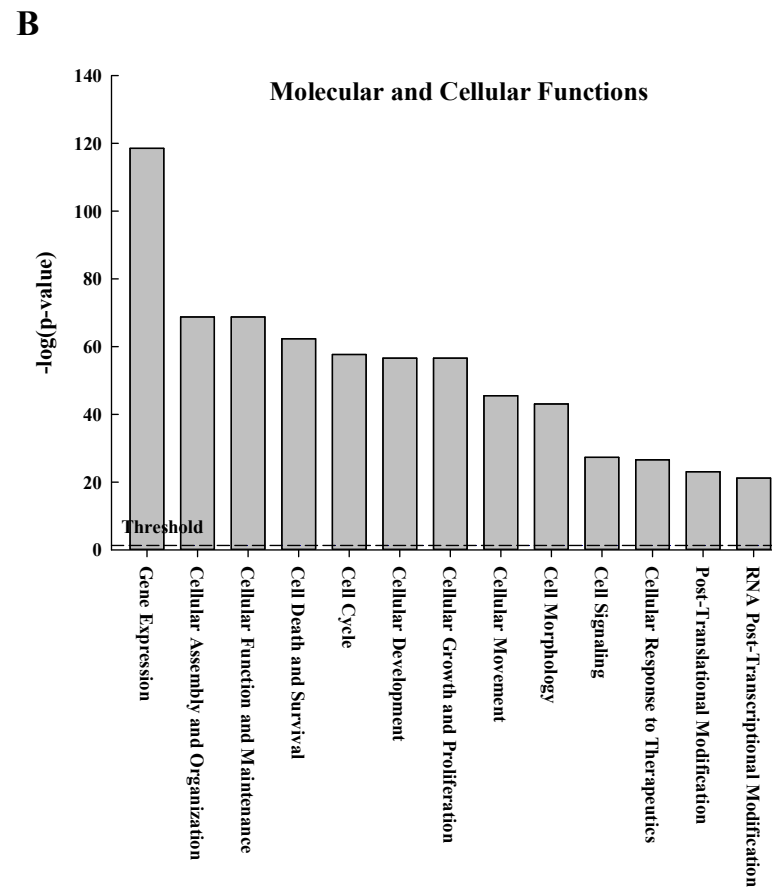

**Supplementary Figure S1.** Functional analysis of (-)-SDS-1-021 upregulated genes. Polysome-bound mRNA from U251 cells treated with vehicle or (-)-SDS-1-021 (10nM, 6 h) was collected and analyzed by RNA-seq (three biological replicates per treatment group). **A.** GSEA hallmarks enriched in (-)-SDS-1-021 upregulated genes. **B.** IPA defined significant molecular and cellular functions in (-)-SDS-1-021 upregulated genes (adjusted p-value < 0.05).
