# Supplementary material
Source: PubMed Central journal article supplement (PMC9452469)
Supplement: NIHMS1819627-supplement-2.pdf [file NIHMS1819627-supplement-2.pdf]

**A**

| Symbol  | Name                                                                            | Log <sub>2</sub> Fold Change | Adj. p-value |
|---------|---------------------------------------------------------------------------------|------------------------------|--------------|
| ACTB    | actin beta                                                                      | -0.636370937                 | 5.7814E-06   |
| ACTL6A  | actin like 6A                                                                   | -0.471717992                 | 2.90671E-06  |
| BLM     | BLM RecQ like helicase                                                          | -0.476665305                 | 7.74594E-06  |
| BRD8    | bromodomain containing 8                                                        | -0.738430419                 | 4.48569E-11  |
| CDC7    | cell division cycle 7                                                           | -0.700233022                 | 1.88184E-07  |
| ERCC6   | ERCC excision repair 6, chromatin remodeling factor                             | -0.530745659                 | 0.001416183  |
| FANCM   | FA complementation group M                                                      | -0.573460014                 | 0.000140507  |
| GINS2   | GINS complex subunit 2                                                          | -0.900240107                 | 3.06055E-23  |
| GINS4   | GINS complex subunit 4                                                          | -0.48599873                  | 2.52933E-06  |
| H2AX    | H2A.X variant histone                                                           | -1.091249193                 | 1.90066E-08  |
| HDGFL2  | HDGF like 2                                                                     | -0.99982922                  | 3.61184E-14  |
| INIP    | INTS3 and NABP interacting protein                                              | -0.43829688                  | 1.26451E-05  |
| MBTD1   | mbt domain containing 1                                                         | -1.000407161                 | 2.0939E-14   |
| MCM2    | minichromosome maintenance complex component 2                                  | -0.23799234                  | 0.020411553  |
| MCM3    | minichromosome maintenance complex component 3                                  | -0.430770709                 | 2.25252E-06  |
| MCM5    | minichromosome maintenance complex component 5                                  | -0.545834473                 | 1.50411E-07  |
| MCM6    | minichromosome maintenance complex component 6                                  | -0.670505317                 | 4.79145E-12  |
| MMS19   | MMS19 homolog, cytosolic iron-sulfur assembly component                         | -0.206042809                 | 0.046273294  |
| MORF4L1 | mortality factor 4 like 1                                                       | -0.907771869                 | 3.06377E-14  |
| MORF4L2 | mortality factor 4 like 2                                                       | -0.419326161                 | 9.30427E-05  |
| MRGBP   | MRG domain binding protein                                                      | -0.706933304                 | 6.10919E-10  |
| NABP2   | nucleic acid binding protein 2                                                  | -0.590730714                 | 5.01043E-09  |
| NSMCE1  | NSE1 homolog, SMC5-SMC6 complex component                                       | -0.491856523                 | 3.95488E-05  |
| NSMCE4A | NSE4 homolog A, SMC5-SMC6 complex component                                     | -0.51618941                  | 2.47823E-06  |
| NUCKS1  | nuclear casein kinase and cyclin dependent kinase substrate 1                   | -0.76368152                  | 3.43711E-10  |
| PARP1   | poly(ADP-ribose) polymerase 1                                                   | -0.945084921                 | 1.06948E-24  |
| PPP4C   | protein phosphatase 4 catalytic subunit                                         | -0.507038628                 | 1.43288E-05  |
| RAD51C  | RAD51 paralog C                                                                 | -0.665361468                 | 7.31802E-07  |
| RAD54B  | RAD54 homolog B                                                                 | -0.748776117                 | 2.42903E-05  |
| RADX    | RPA1 related single stranded DNA binding protein, X-linked                      | -1.080026498                 | 0.000335607  |
| RECQL4  | RecQ like helicase 4                                                            | -0.391144034                 | 0.02659027   |
| RM12    | RecQ mediated genome instability 2                                              | -1.259521743                 | 4.56323E-11  |
| RPA1    | replication protein A1                                                          | -1.080490817                 | 8.60383E-33  |
| RPA2    | replication protein A2                                                          | -0.264740006                 | 0.006070761  |
| RUVBL2  | RuvB like AAA ATPase 2                                                          | -0.304921681                 | 0.013341315  |
| SAMHD1  | SAM and HD domain containing deoxynucleoside triphosphate triphosphohydrolase 1 | -1.784767697                 | 1.39798E-44  |
| SHLD1   | shieldin complex subunit 1                                                      | -0.723218188                 | 0.010762896  |
| SHLD2   | shieldin complex subunit 2                                                      | -0.286024455                 | 0.027059805  |
| SMC5    | structural maintenance of chromosomes 5                                         | -0.905439951                 | 2.80877E-22  |
| SPDR    | scaffold protein involved in DNA repair                                         | -0.589954307                 | 6.13696E-07  |
| SWI5    | SWI5 homologous recombination repair protein                                    | -0.558223224                 | 2.03893E-06  |
| TONSL   | tonsoku like, DNA repair protein                                                | -0.451827542                 | 0.004066081  |
| UBQLN4  | ubiquilin 4                                                                     | -0.293885848                 | 0.002180197  |
| XRCC1   | X-ray repair cross complementing 1                                              | -0.686336177                 | 3.49661E-08  |
| XRCC2   | X-ray repair cross complementing 2                                              | -0.349168994                 | 0.000961042  |
| XRCC3   | X-ray repair cross complementing 3                                              | -0.377619127                 | 0.016287229  |
| YEATS4  | YEATS domain containing 4                                                       | -0.593143495                 | 2.17734E-07  |
| ZSWIM7  | zinc finger SWIM-type containing 7                                              | -0.61092711                  | 0.000116039  |

**B**

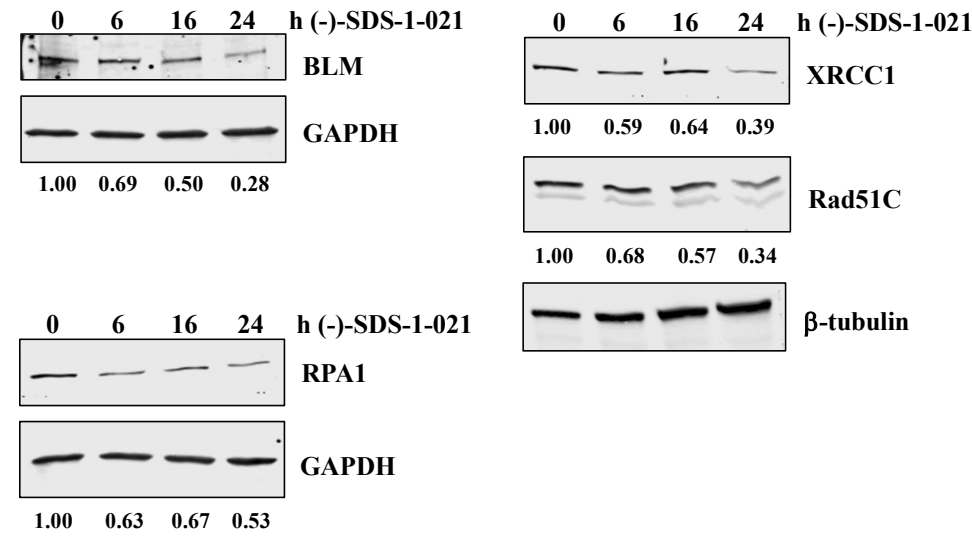

**Supplementary Figure S2. A.** (-)-SDS-1-021 downregulated genes (adj. p-value < 0.05) annotated with the GO term “double-strand break repair by homologous recombination” (GO:0000724). **B.** Validation of (-)-SDS-1-021 downregulation of HR genes by western blot. U251 cells were treated with vehicle or 10 nM (-)-SDS-1-021 for the indicated times and immunoblotted for selected HR genes. GAPDH and β-tubulin were used as loading controls. Normalized ratios of HR proteins to loading control are shown below the blots.
